# Supplementary material for: Effects of potassium additive on the activity of Ru catalyst for acetylene hydrochlorination
Source: Royal Society of Chemistry journal article supplement (doi:10.1039/c5ra03466c), 2015-01-01
Supplement: c5ra03466c1.pdf [file c5ra03466c1.pdf]

## 1 Contents

2 **Fig. S1.** (a) The acetylene conversion over Ru/K catalysts with the Ru/K ratio ranged  
3 from 1:0.1 to 1:4, (b) the relationship between the acetylene conversion and the molar  
4 ratio of Ru/K. Reaction conditions:  $T = 170^{\circ}\text{C}$ ,  $\text{GHSV}(\text{C}_2\text{H}_2) = 900 \text{ h}^{-1}$ ,  $V(\text{HCl})/V$   
5  $(\text{C}_2\text{H}_2) = 1.1$ .

6 **Fig. S2.**  $\text{N}_2$  adsorption-desorption isotherms (a) and the corresponding pore size  
7 distribution of fresh and used samples (b).

8 **Fig. S3.** TG and DTG curves of the catalysts including (a) 1% Ru1K0.5/SAC, (b) 1%  
9 Ru1K2/SAC

10 **Fig. S4.** Ru 3p3 XPS spectra of the fresh catalysts : (a) Ru/SAC; (b) Ru1K0.5/SAC;  
11 (c) Ru1K1/SAC; (d) Ru1K2/SAC

12 **Fig. S5.** Ru 3p3 XPS spectra of the used catalysts : (a) Ru/SAC; (b) Ru1K0.5/SAC; (c)  
13 Ru1K1/SAC; (d) Ru1K2/SAC

14 **Table S1.** Weight loss of the fresh and used Ru-based catalysts at different  
15 temperature ranges.

16 **Table S2.** TOF of Ru-based catalysts and the corresponding acetylene conversion and  
17 selectivity to VCM.

18

19

20

21

22

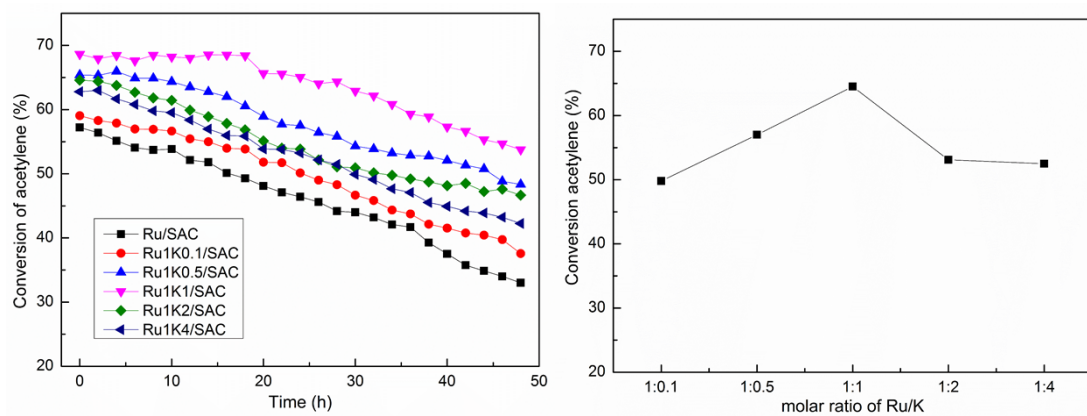

23

24 **Fig. S1.** (a) The acetylene conversion over Ru/K catalysts with the Ru/K ratio ranged

25 from 1:0.1 to 1:4, (b) the relationship between the acetylene conversion and the molar

26 ratio of Ru/K. Reaction conditions:  $T = 170^{\circ}\text{C}$ ,  $\text{GHSV}(\text{C}_2\text{H}_2) = 900 \text{ h}^{-1}$ ,  $V(\text{HCl})/V$

27  $(\text{C}_2\text{H}_2) = 1.1$ .

28

29

30

31

32

33

34

35

36

37

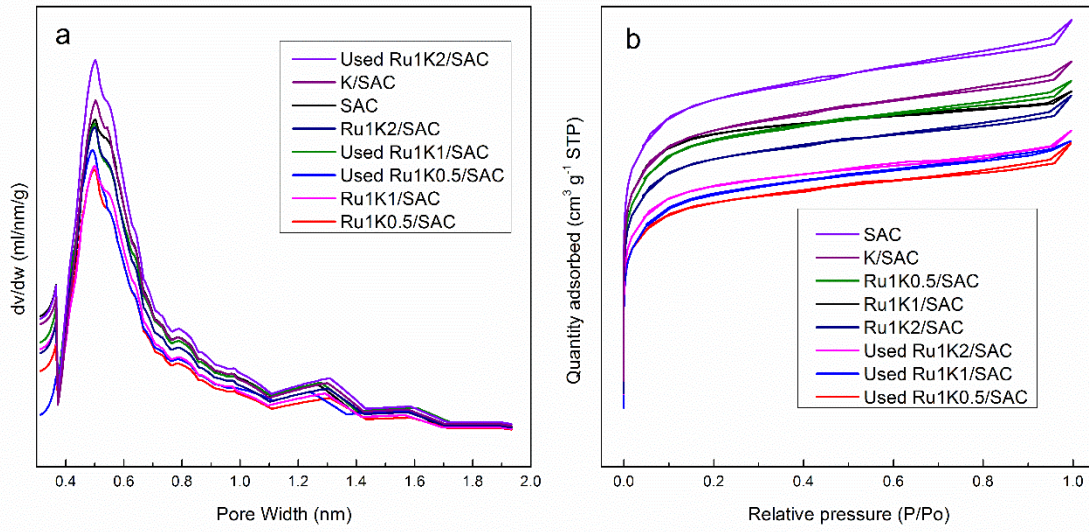

38

39 **Fig. S2.**  $N_2$  adsorption-desorption isotherms (a) and the corresponding pore size  
 40 distribution of fresh and used samples (b).

41

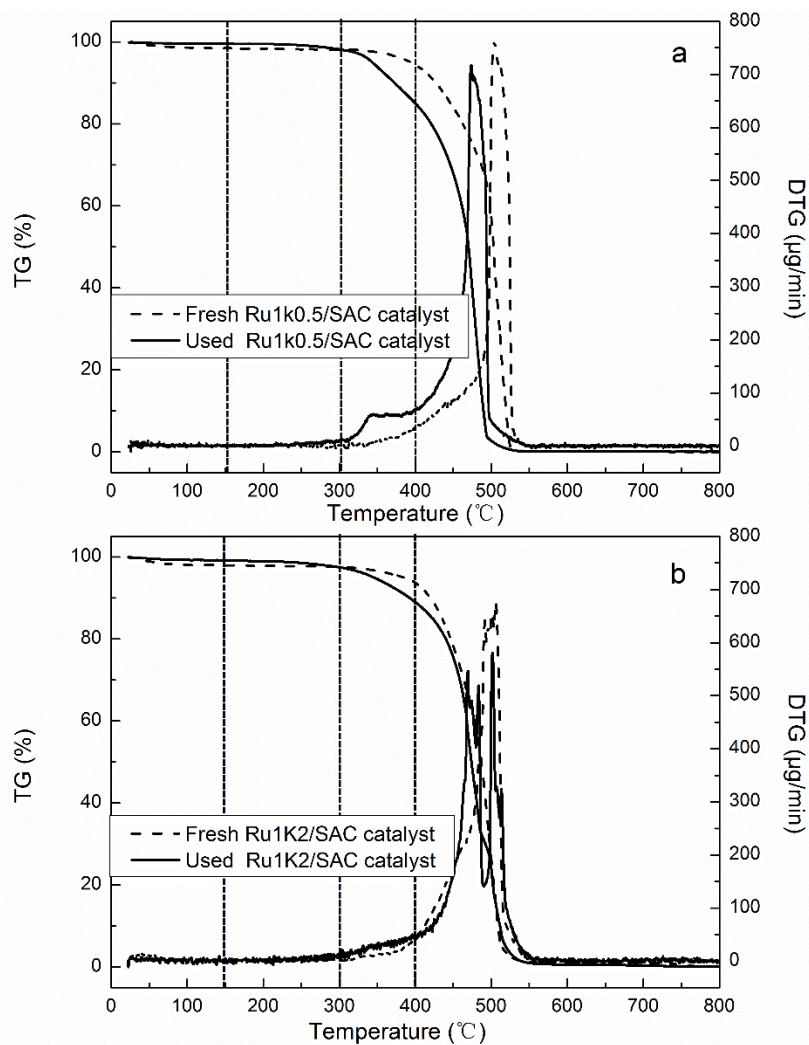

42

43 **Fig. S3.** TG and DTG curves of the catalysts including (a) 1% Ru1K0.5/SAC, (b) 1%

44 Ru1K2/SAC

45

46

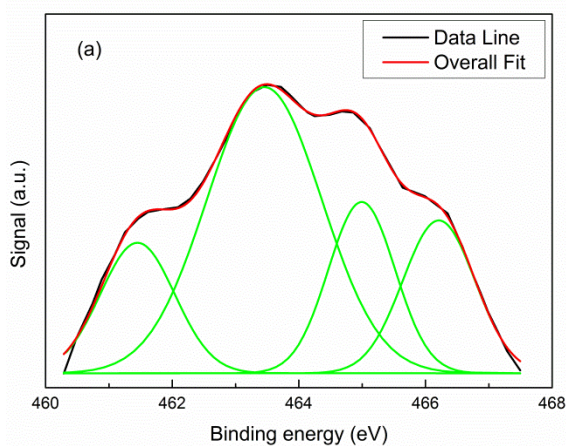

47

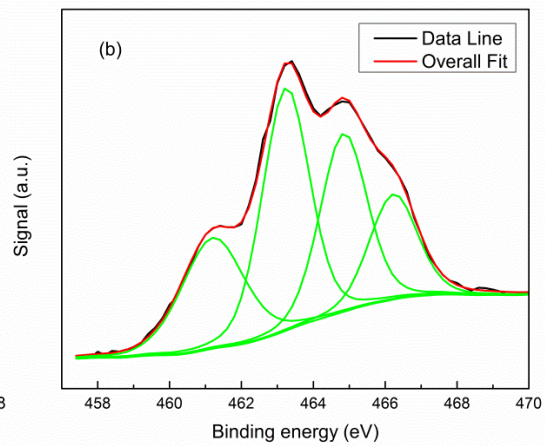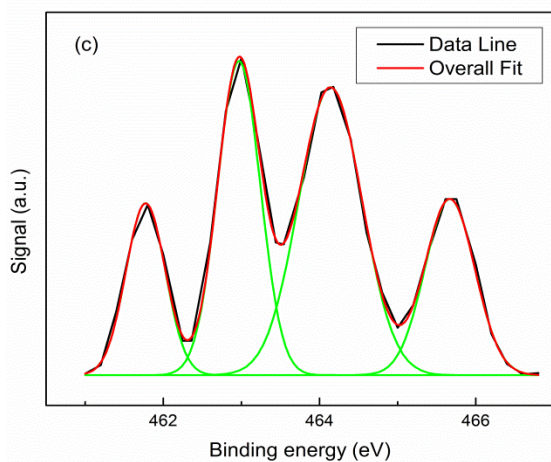

48

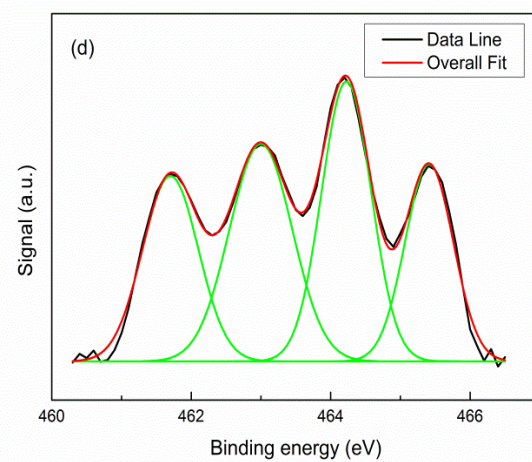

49 **Fig. S4.** Ru 3p<sub>3/2</sub> XPS spectra of the fresh catalysts : (a) Ru/SAC; (b) Ru1K0.5/SAC;  
 50 (c) Ru1K1/SAC; (d) Ru1K2/SAC

51

52

53

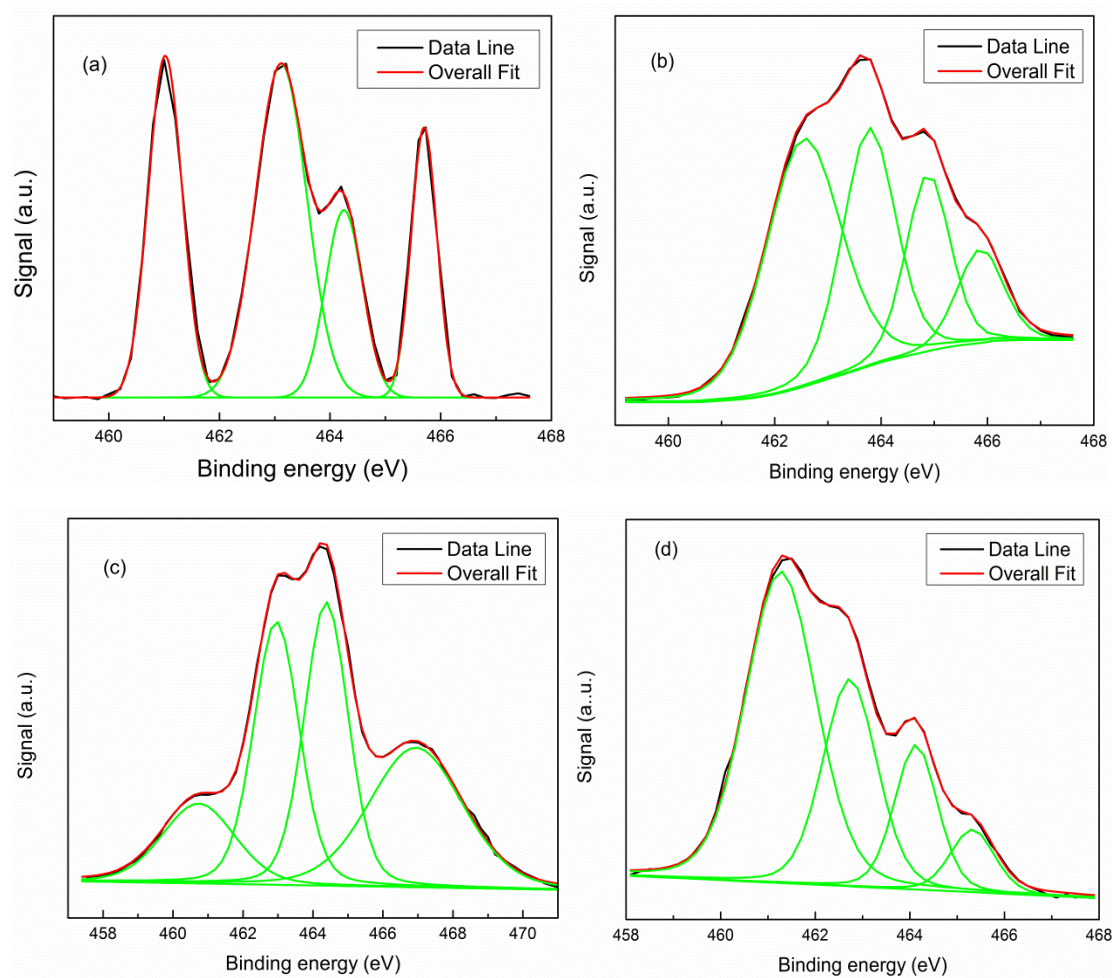

54

55

56 **Fig. S5.** Ru 3p3 XPS spectra of the used catalysts : (a) Ru/SAC; (b) Ru1K0.5/SAC; (c)

57 Ru1K1/SAC; (d) Ru1K2/SAC

58

59

60

61

62

63

64

65

66 **Table S1.** Weight loss of fresh and used Ru-based catalysts at different temperature

67 ranges.

| Catalysts         | Temperature range (°C) |         |         |         |
|-------------------|------------------------|---------|---------|---------|
|                   | <150                   | 150-300 | 300-400 | 150-400 |
| Fresh Ru/SAC      | 1.8                    | 0.6     | 4.6     | 5.2     |
| Used Ru/SAC       | 4.4                    | 4.6     | 11.4    | 16      |
| Fresh Ru1K0.5/SAC | 1.3                    | 0.5     | 3.7     | 4.2     |
| Used Ru1K0.5/SAC  | 0.3                    | 1.4     | 13.2    | 14.6    |
| Fresh Ru1K1/SAC   | 1.4                    | 0.6     | 4.7     | 5.3     |
| Used Ru1K1/SAC    | 0.4                    | 1.6     | 13      | 14.6    |
| Fresh Ru1K2/SAC   | 1.8                    | 0.5     | 3.9     | 4.4     |
| Used Ru1K2/SAC    | 0.7                    | 1.8     | 8.5     | 10.3    |

68

69

70

71

72

73

74

75

76

77

78

79

80

81

82

83 **Table S2.** TOF of Ru-based catalysts and the corresponding acetylene conversion and  
84 selectivity to VCM.

| Catalysts   | $X_A$ (%) <sup>a</sup> | $S_{VC}$ (%) | TOF ( $\text{min}^{-1}$ ) <sup>b</sup> |
|-------------|------------------------|--------------|----------------------------------------|
| Ru/SAC      | 10.3                   | 98.9         | 1.89                                   |
| Ru1K0.5/SAC | 15.3                   | 99.4         | 2.12                                   |
| Ru1K1/SAC   | 18.0                   | 99.6         | 2.45                                   |
| Ru1K2/SAC   | 14.4                   | 99.5         | 2.02                                   |

85 Reaction conditions:  $T = 170^\circ\text{C}$ ,  $V(\text{HCl})/V(\text{C}_2\text{H}_2) = 1.15$ ,  $\text{GHSV}(\text{C}_2\text{H}_2) = 2700 \text{ h}^{-1}$ , reaction time  
86 =12 h.

87
